# Supplementary material for: Elabela: Negative Regulation of Ferroptosis in Trophoblasts via the Ferritinophagy Pathway Implicated in the Pathogenesis of Preeclampsia
Source: MDPI journal article supplement (doi:10.3390/cells12010099), 2022-12-26
Supplement: s1 [file s1]

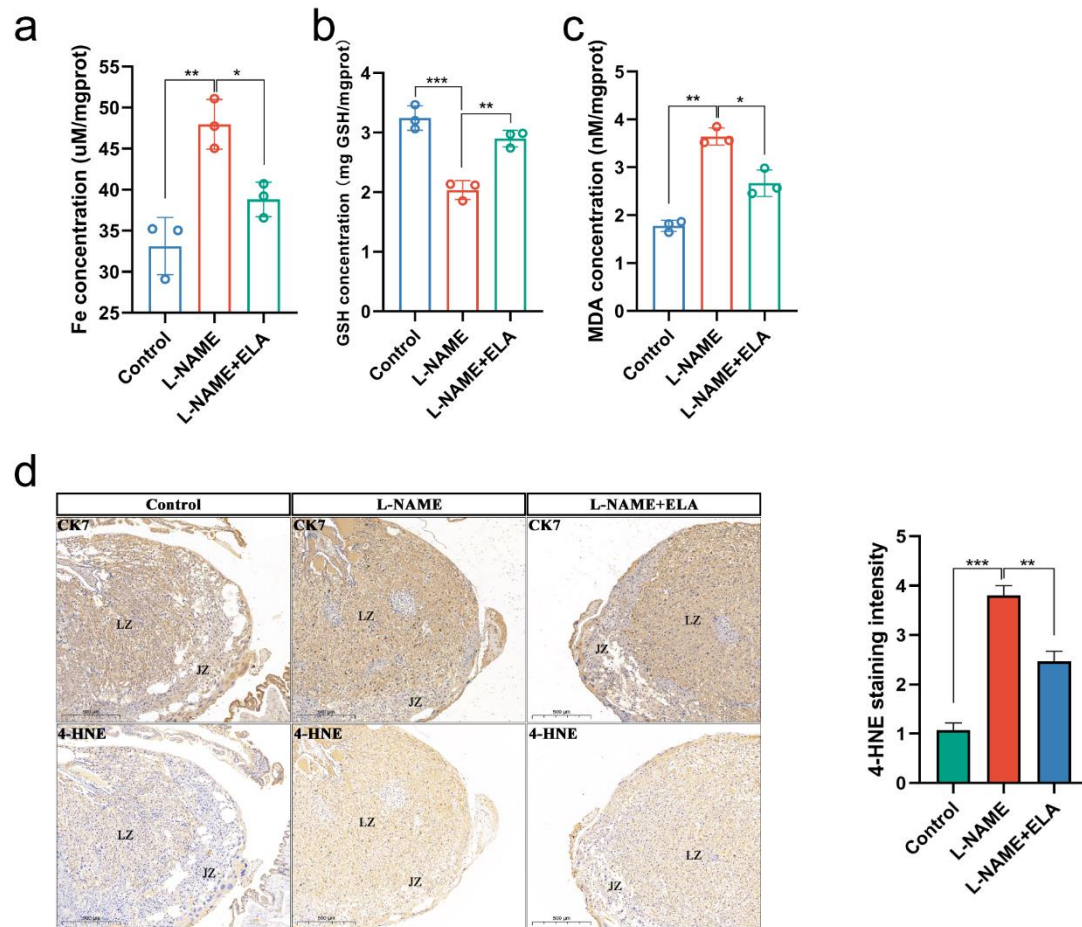

**Figure S1. The ferroptosis phenotypes in mice were relieved by Elabela administration**

(a)iron concentration, (b)GSH concentration, and (c)MDA concentration were measured in mice placentas using the corresponding detection kits; n=3. (d) IHC staining of 4-HNE in mouse placentas; n=3. Scale bars: 500  $\mu$ m. One-way ANOVA and Tukey's multiple comparison test. All data are presented as the means  $\pm$  SEM. \*p<0.05; \*\*p<0.01; \*\*\*p<0.001.

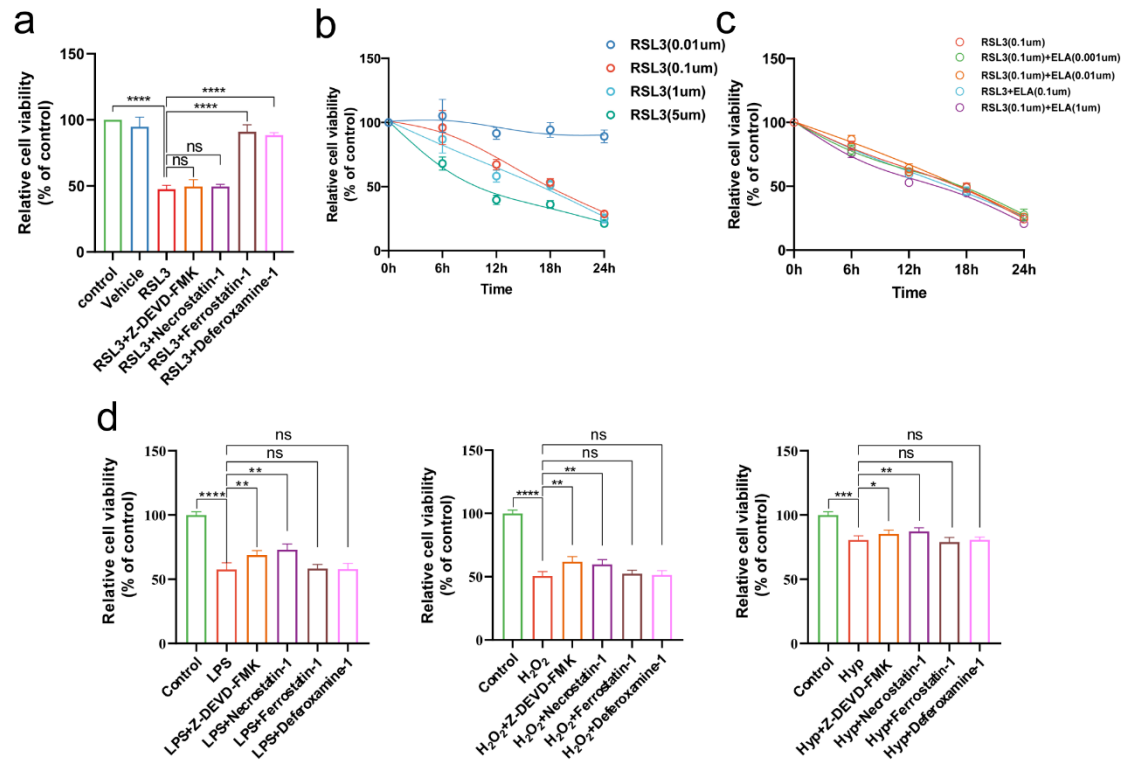

**Figure S2. Alternate approaches to constructing ferroptosis models for HTR-8/Svneo cells**

Construction of ferroptosis model by treating HTR-8/Svneo cells with RSL3, LPS, H<sub>2</sub>O<sub>2</sub>, and Hypoxia, respectively. Pretreatment with apoptosis inhibitor (Z-DEVD-FMK, 20μM), necrosis inhibitor (Necrostatin-1, 0.5μM), and ferroptosis inhibitor (Ferrostatin-1, 60nM; Deferoxamine-1 100 μM) for 1h, then cells were treated in the presence of (a) RSL(0.1μM), (d)LPS (20μM), H<sub>2</sub>O<sub>2</sub>(50μM), or Hypoxia (1% O<sub>2</sub>), and 18 h later, cell viability was determined by CCK8; n=6. (b) After treatment with different concentrations of RSL3 for different times, CCK8 was used to determine cell viability; n=6. (c) Pretreatment with different concentrations of Elabela for 1 hour, then RSL3(0.1μM) were added into HTR-8/Svneo cells for treated different times, and cell viability was measured by CCK8; n=6. One-way ANOVA and Tukey's multiple comparison test. All data are presented as the means ± SEM. ns, non-Significant; \*p<0.05; \*\*p<0.01; \*\*\*p<0.001; \*\*\*\*p<0.0001.

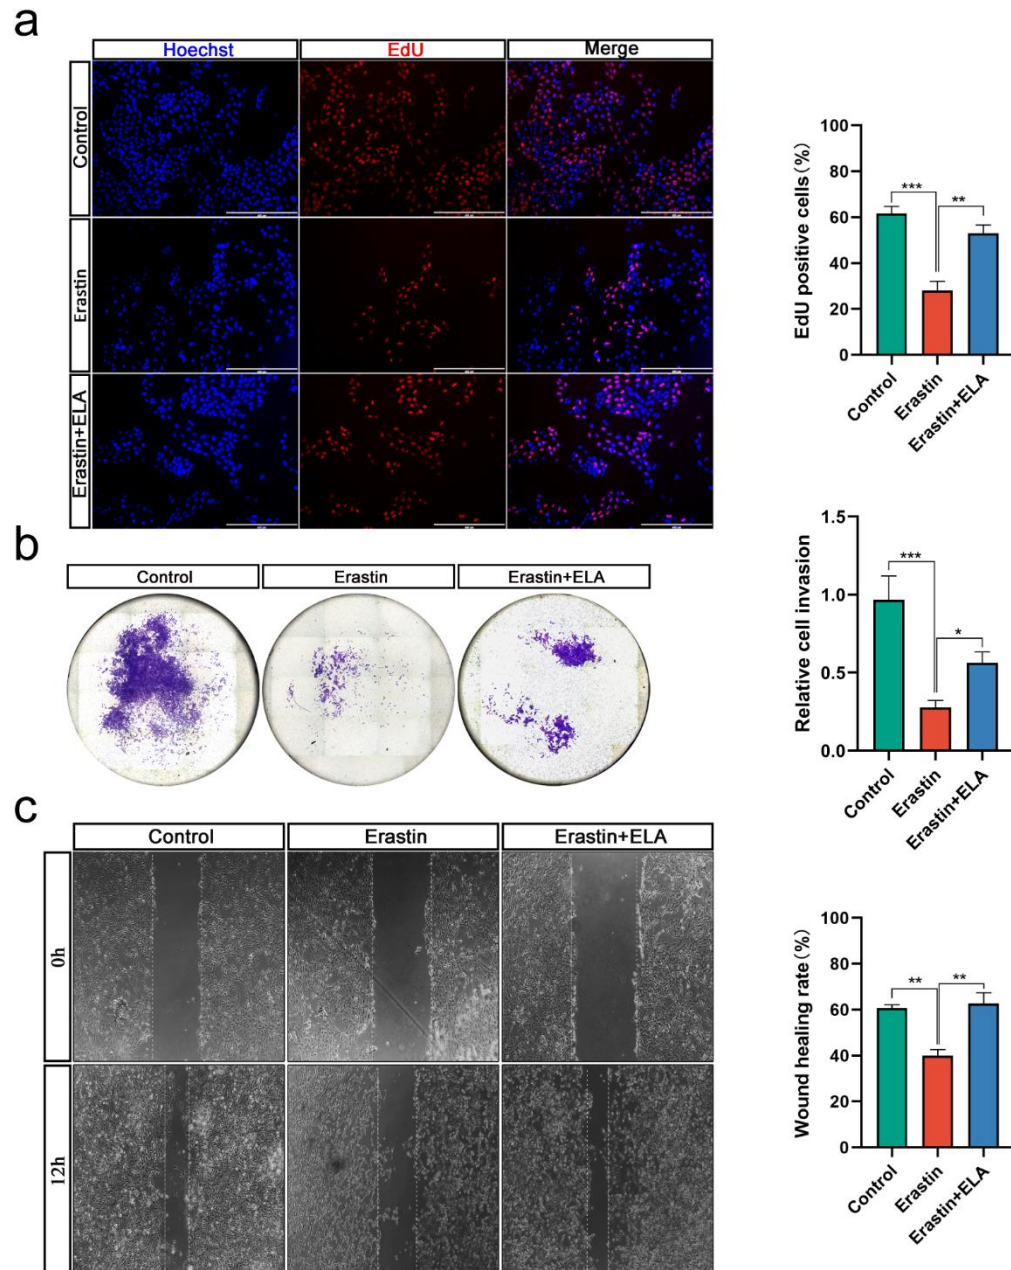

**Figure S3. Elabela rescued Erastin-induced HTR-8/Svneo cells dysfunction**  
HTR-8/Svneo cells were treated with Erastin (5 $\mu$ m) and Elabela (0.01 $\mu$ m) as indicated.  
**(a)**EdU staining,n=3. Scale bars: 400  $\mu$ m. **(b)** Matrigel Transwell assay;n=3. Scale bars: 200  $\mu$ m.**(c)** Wound-healing assay;n=3. Scale bars: 400  $\mu$ m. One-way ANOVA and Tukey's multiple comparison test. All data are presented as the means  $\pm$  SEM. \*p<0.05; \*\*p<0.01; \*\*\*p<0.001.

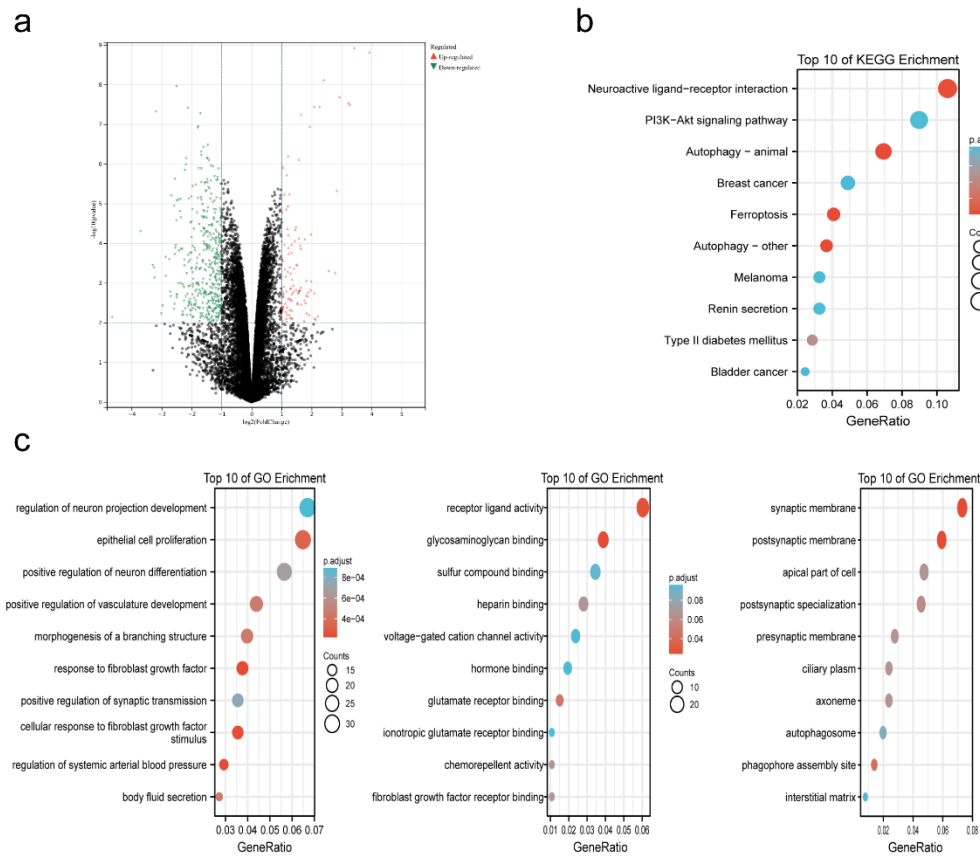

**Figure S4. Bioinformatics analysis of differentially expressed genes**  
**(a)** Volcano plot of the significant differences in gene expression levels between groups; genes showing the greatest differences were analyzed by **(b)** KEGG and **(c)** GO analysis.

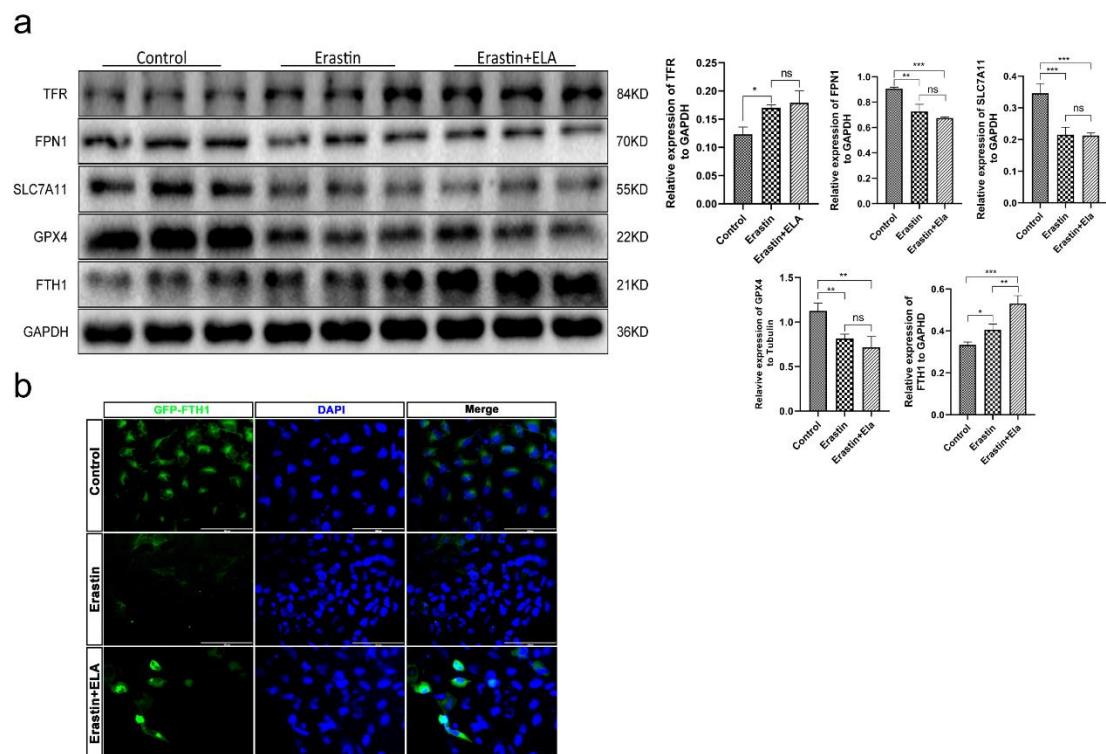

**Figure S5. Elabela increased the protein level of FTH1**

HTR-8/Svneo cells were treated with Erastin (5 $\mu$ m) and Elabela (0.01 $\mu$ m) as indicated.

|                                      | Normal (n=20)     | PE (n=20)         | p value |
|--------------------------------------|-------------------|-------------------|---------|
| Age (years)                          | 28.80 $\pm$ 1.96  | 29.75 $\pm$ 2.22  | 0.16    |
| Gestational age (weeks)              | 40.13 $\pm$ 0.50  | 34.11 $\pm$ 1.28  | <0.0001 |
| Body mass index (kg/m <sup>2</sup> ) | 27.47 $\pm$ 0.87  | 27.96 $\pm$ 1.11  | 0.1287  |
| Urinary protein (g/24h)              | -                 | 3.27 $\pm$ 0.48   | -       |
| Systolic blood pressure (mmHg)       | 124.5 $\pm$ 6.7   | 157.4 $\pm$ 6.42  | <0.0001 |
| Diastolic blood pressure (mmHg)      | 80.65 $\pm$ 4.57  | 110.8 $\pm$ 7.42  | <0.0001 |
| Fetal birth weight (g)               | 3278 $\pm$ 328.5  | 2012 $\pm$ 196.3  | <0.0001 |
| Weight of placenta (g)               | 545.4 $\pm$ 29.84 | 441.3 $\pm$ 21.97 | <0.0001 |

(a)WB detection the protein levels of TFR, FPN1, SLC7A11, GPX4, FTH1; n=3. Fluorescence images of exogenous FTH1(green), DAPI (blue) stained nucleus; n=3. Scale bars: 100  $\mu$ m. One-way ANOVA and Tukey's multiple comparison test. All data are presented as the means  $\pm$  SEM. ns, non-Significant; \*p<0.05; \*\*p<0.01; \*\*\*p<0.001.

**Table S1. Clinical characteristics of the study subjects**

**Table S2. Sequences of siRNAs**

| siRNA | Sequences (5' $\rightarrow$ 3') |                       |
|-------|---------------------------------|-----------------------|
| ATG5  | Forward                         | GAAGGUUAUGAGACAAGAATT |
|       | Reverse                         | UUCUUGUCUCAUAACCUUCTT |
| NCOA4 | Forward                         | CCAGGAAGUAUUACUUAUUTT |
|       | Reverse                         | AUUAAGUAAUACUUCUGGTT  |
| NC    | Forward                         | TTCTCCGAACGTGTCACGT   |
|       | Reverse                         | UUCUCC AACGUGUCACGUTT |

**Table S3. Sequences of primers used in this study (Homo)**

| Primers (Homo) | Sequences (5' $\rightarrow$ 3') |                          |
|----------------|---------------------------------|--------------------------|
| Elabela        | Forward                         | AGAGAAGAAGAGGAGTGAAGGA   |
|                | Reverse                         | CCATTCCAGGTGCTTTCAAAT    |
| $\beta$ -actin | Forward                         | TGGCACCCAGCACAATGAA      |
|                | Reverse                         | TAAGTCATAGTCCGCCTAGAAGCA |



| GO                        |                                                        |                                                 |
|---------------------------|--------------------------------------------------------|-------------------------------------------------|
|                           | Go terms                                               | Genes                                           |
| <b>Cellular component</b> | Synaptic membrane                                      | ADORA2A/ANK3/CACNA1C/CDH10/CHRM3/COL13A1        |
|                           | Postsynaptic membrane                                  | ADORA2A/ANK3/CACNA1C/CDH10/CHRM3/COL13A1        |
|                           | Phagophore assembly site                               | BECN1/ATG12/ATG5/ATG7/ATG14/ATG16L1/ATG9B       |
|                           | Postsynaptic specialization                            | ADORA2A/CACNA1C/CDH10/CHRM3/CTNND2/DLG4/EPHA7   |
|                           | Apical part of cell                                    | AQP8/CA2/FAP/KISS1/LDLR/MYO7B/NF2/OXTR/P2RY4    |
| <b>Molecular function</b> | Glycosaminoglycan binding                              | COL13A1/VCAN/ECM2/FGF1/FGF2/FGF7/LAMC2          |
|                           | Receptor ligand activity                               | ADCYAP1/CGA/EDN1/EPHA7/FGF1/FGF2/FGF5           |
|                           | Glutamate receptor binding                             | ADORA2A/DLG4/PTEN/RAPSN/SHANK2/LRRC7/SYNDIG1    |
|                           | Fibroblast growth factor receptor binding              | FGF1/FGF2/FGF5/FGF7/FLRT2                       |
|                           | Heparin binding                                        | COL13A1/ECM2/FGF1/FGF2/FGF7/LAMC2/PLA2G5/SLIT3  |
| <b>Biological process</b> | Response to fibroblast growth factor                   | EGR3/FGF1/FGF2/FGF5/FGF7/FGFR3/GALNT3           |
|                           | Regulation of systemic arterial blood pressure         | ADRA1B/AGTR1/AR/AVPR2/CPA3/EDN1/OXTR/REN        |
|                           | Cellular response to fibroblast growth factor stimulus | EGR3/FGF1/FGF2/FGF5/FGF7/FGFR3/GALNT3/GCLM      |
|                           | Epithelial cell proliferation                          | AGTR1/AR/ARNT/COL8A1/EGR3/FAP/FGF1/FGF2/FGF7    |
|                           | Positive regulation of vasculature development         | AGTR1/EGR1/FGF1/FGF2/HK2/HMOX1/CXCL8/TERT/VEGFA |

**Table S4. Top 5 enriched GO of differentially expressed genes**

| KEGG     |                                         |                                                         |
|----------|-----------------------------------------|---------------------------------------------------------|
| Kegg_ID  | Pathway                                 | Genes                                                   |
| hsa04216 | Ferroptosis                             | ALOX15/ACSL4/FTH1/FTL/GCLM/HMOX1/TP53/NCOA4/ATG5/ATG7   |
| hsa04136 | Autophagy - other                       | MTOR/BECN1/ATG12/ATG5/ATG7/ATG16L1/ATG3/ATG10/ATG9B     |
| hsa04140 | Autophagy - animal                      | MTOR/IRS1/PTEN/PIK3R3/VAMP8/BECN1/ATG12/ATG5/ATG7/ATG14 |
| hsa04080 | Neuroactive ligand-receptor interaction | ADCYAP1/ADORA2A/ADRA1D/ADRA1B/ADRA2A/AGTR1/AVPR2        |
| hsa04930 | Type II diabetes mellitus               | CACNA1C/MTOR/HK2/IRS1/KCNJ11/PRKCE/PIK3R3               |

**Table S5. Top 5 enriched KEGG pathways of differentially expressed genes**
